# Supplementary material for: MicroRNA-148a regulates low-density lipoprotein metabolism by repressing the (pro)renin receptor
Source: PubMed Central journal article supplement (PMC7241754; doi:10.1371/journal.pone.0225356), 2020-05-21

F1\_C\_HepG2\_β-tubulin

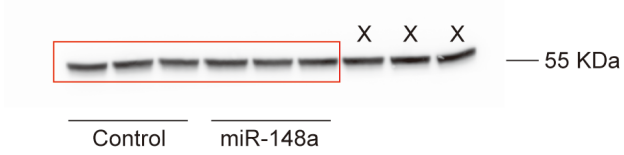

F1\_C\_HepG2\_(P)RR

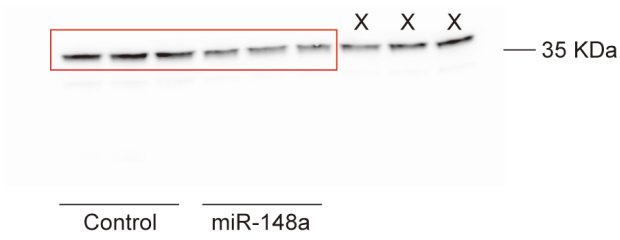

F1\_C\_Huh7\_β-tubulin

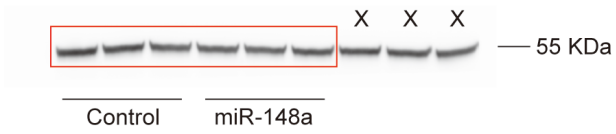

F1\_C\_Huh7\_(P)RR

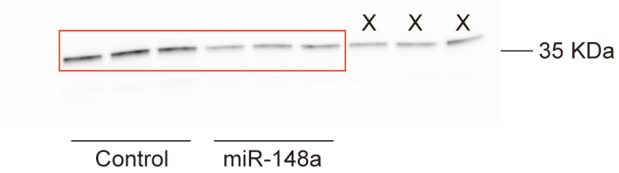

F2\_E\_HepG2\_β-tubulin

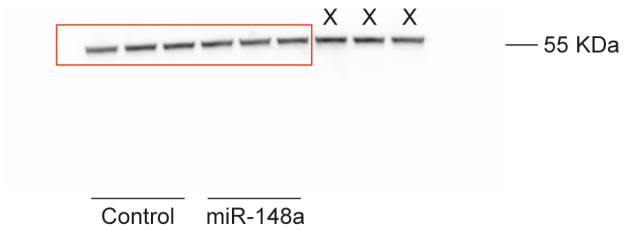

F2\_E\_HepG2\_LDLR

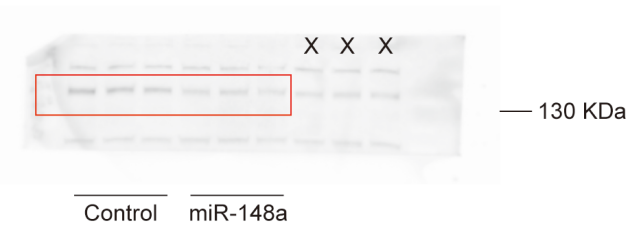

F2\_E\_Huh7\_β-tubulin

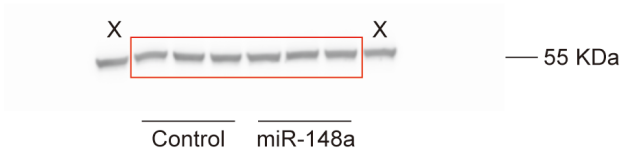

F1\_E\_Huh7\_LDLR

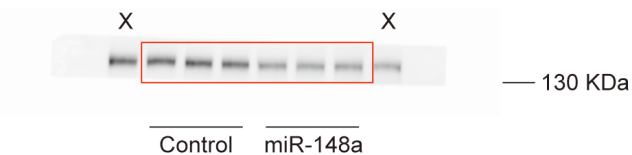

F3\_B\_HepG2\_β-tubulin

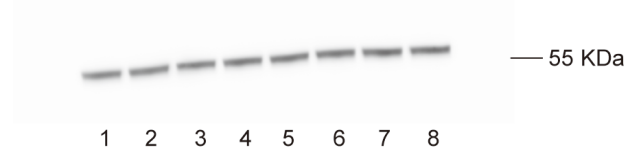

Lane 1 and 2: Control  
 Lane 3 and 4: miR-148a  
 Lane 5 and 6: miR-148a+Control inhibitor  
 Lane 7 and 8: miR-148a+miR-148a inhibitor

F3\_B\_HepG2\_(P)RR

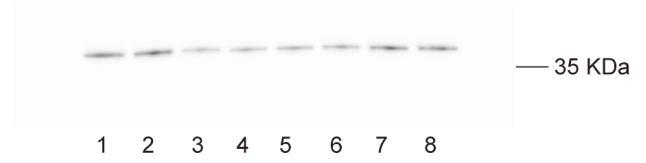

Lane 1 and 2: Control  
 Lane 3 and 4: miR-148a  
 Lane 5 and 6: miR-148a+Control inhibitor  
 Lane 7 and 8: miR-148a+miR-148a inhibitor

F3\_B\_HepG2\_LDLR

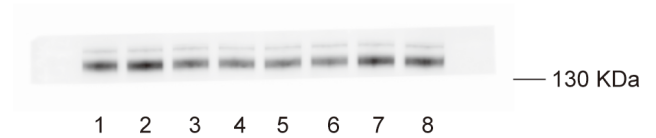

Lane 1 and 2: Control  
 Lane 3 and 4: miR-148a  
 Lane 5 and 6: miR-148a+Control inhibitor  
 Lane 7 and 8: miR-148a+miR-148a inhibitor

F3\_C\_Huh7\_β-tubulin

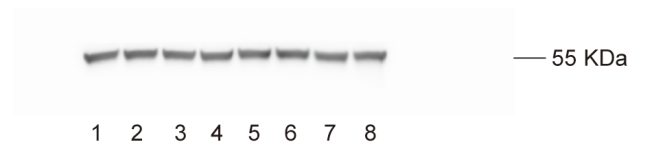

Lane 1 and 2: Control  
 Lane 3 and 4: miR-148a  
 Lane 5 and 6: miR-148a+Control inhibitor  
 Lane 7 and 8: miR-148a+miR-148a inhibitor

F3\_C\_Huh7\_(P)RR

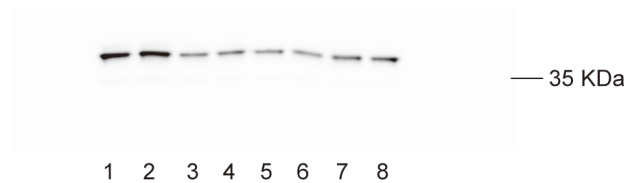

Lane 1 and 2: Control  
 Lane 3 and 4: miR-148a  
 Lane 5 and 6: miR-148a+Control inhibitor  
 Lane 7 and 8: miR-148a+miR-148a inhibitor

F3\_C\_Huh7\_LDLR

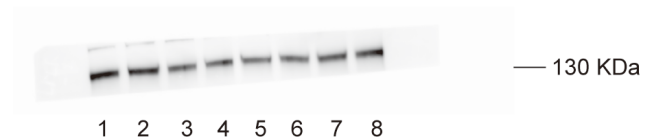

Lane 1 and 2: Control  
 Lane 3 and 4: miR-148a  
 Lane 5 and 6: miR-148a+Control inhibitor  
 Lane 7 and 8: miR-148a+miR-148a inhibitor

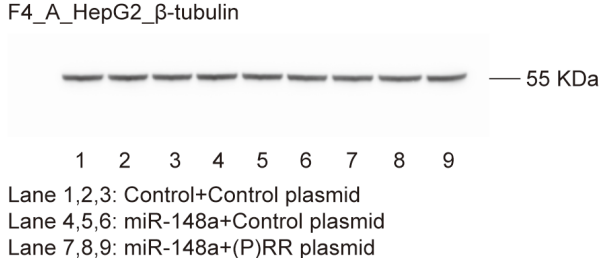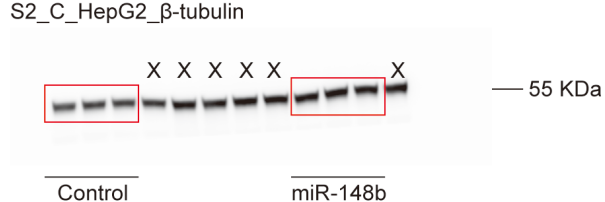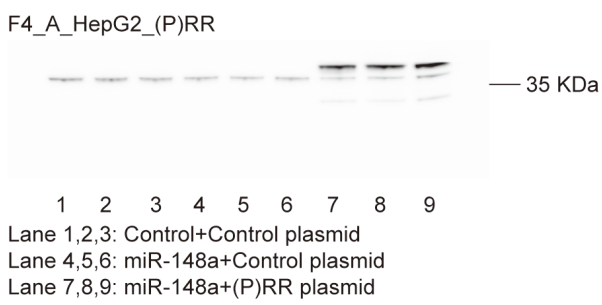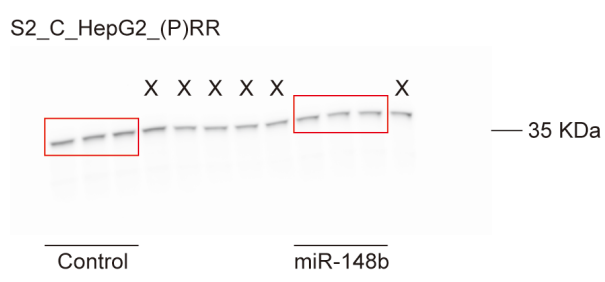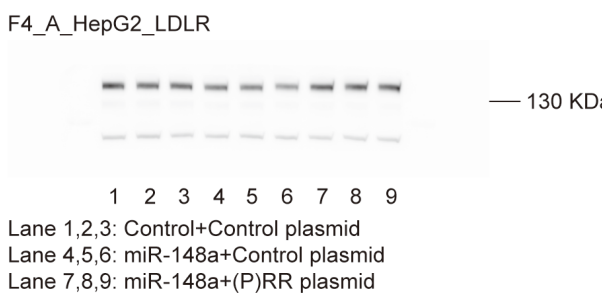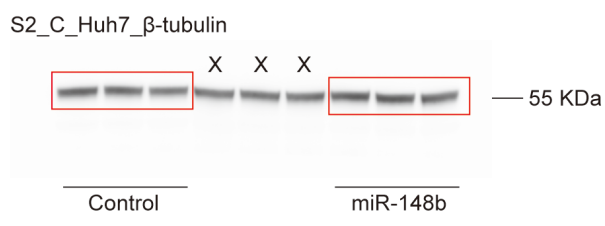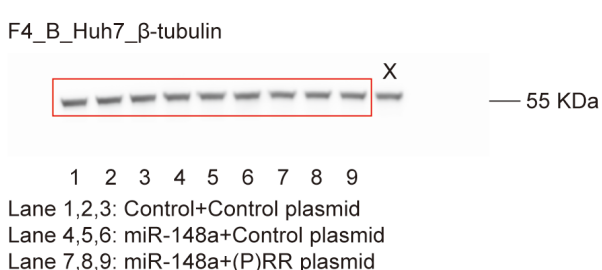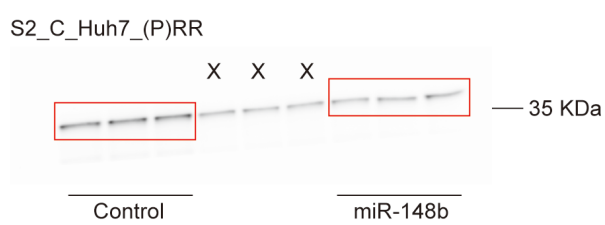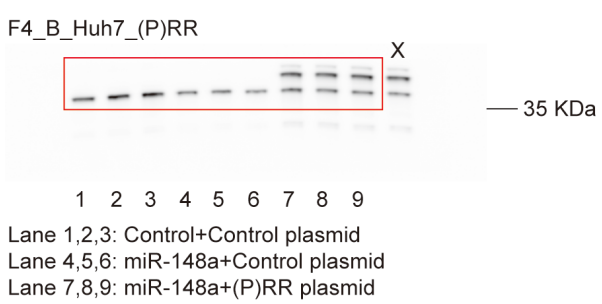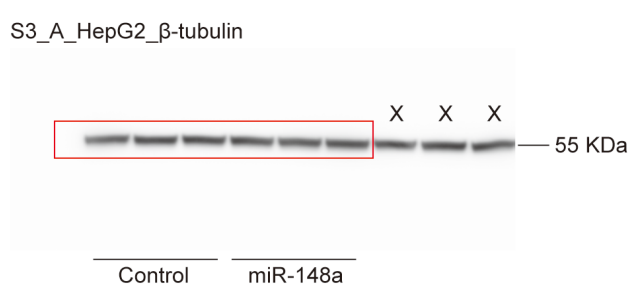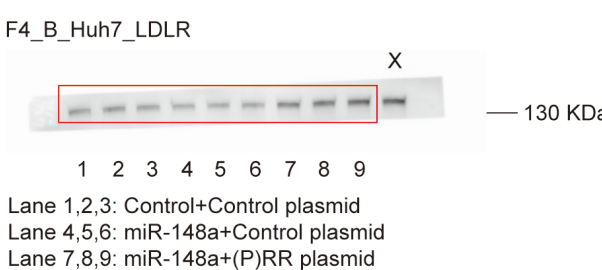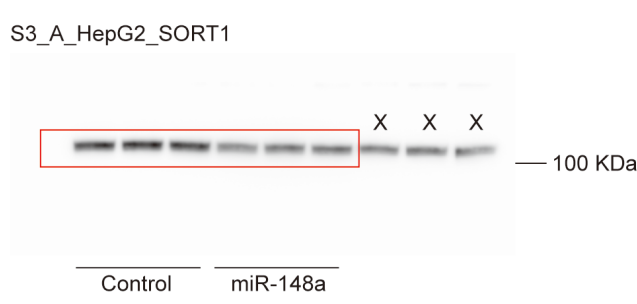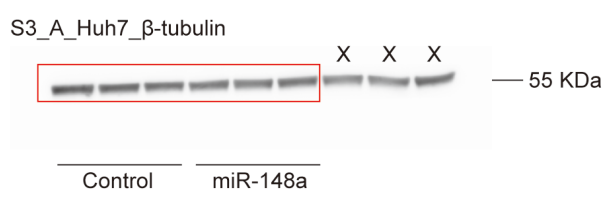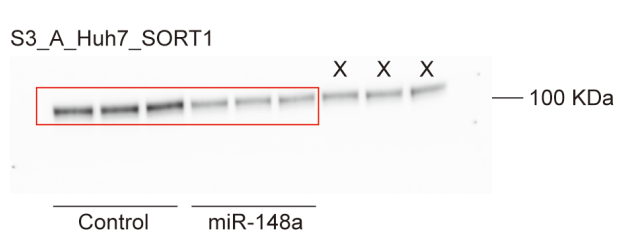

Supplement: pone.0225356.s005.pdf [file pone.0225356.s005.pdf]
